# Supplementary material for: Amorphous Inclusion Complexes: Molecular Interactions of Hesperidin and Hesperetin with HP-Β-CD and Their Biological Effects
Source: MDPI journal article supplement (doi:10.3390/ijms23074000), 2022-04-04
Supplement: s1 [file s1]

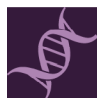

Article

# Amorphous Inclusion Complexes: Molecular Interactions of Hesperidin and Hesperetin with HP- $\beta$ -CD and Their Biological Effects—Supplementary Material

Kamil Wdowiak <sup>1</sup>, Natalia Rosiak <sup>1</sup>, Ewa Tykarska <sup>2</sup>, Marcin Ożarowski <sup>3</sup>, Anita Płazińska <sup>4</sup>, Wojciech Płaziński <sup>5</sup>, and Judyta Cielecka-Piontek <sup>1,\*</sup>

<sup>1</sup> Department of Pharmacognosy, Poznan University of Medical Sciences, Rokietnicka 3, 60-806 Poznan, Poland; kamil.wdowiak@student.ump.edu.pl; nrosiak@ump.edu.pl; jpiontek@ump.edu.pl

<sup>2</sup> Department of Chemical Technology of Drugs, Poznan University of Medical Sciences, Grunwaldzka 6, 60-780 Poznan, Poland; etykarsk@ump.edu.pl

<sup>3</sup> Department of Developmental Neurology, Poznan University of Medical Sciences, Przybyszewski 49, 60-355 Poznan, Poland; zarowski@ump.edu.pl

<sup>4</sup> Department of Biopharmacy, Faculty of Pharmacy, Medical University of Lublin, Chodzki 4a, 20-093 Lublin, Poland; anita.plazinska@umlub.pl

<sup>5</sup> Jerzy Haber Institute of Catalysis and Surface Chemistry, Polish Academy of Sciences, Niezapominajek 8, 30-239 Krakow, Poland; wojtek\_plazinski@o2.pl

\* Correspondence: jpiontek@ump.edu.pl

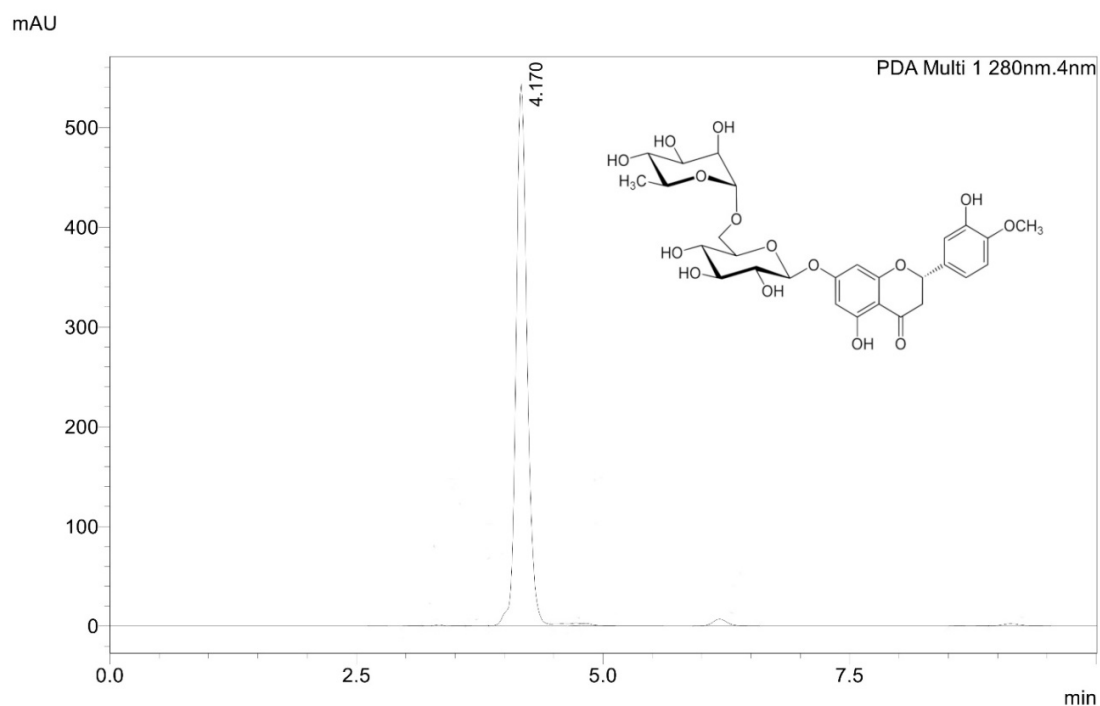

(a)

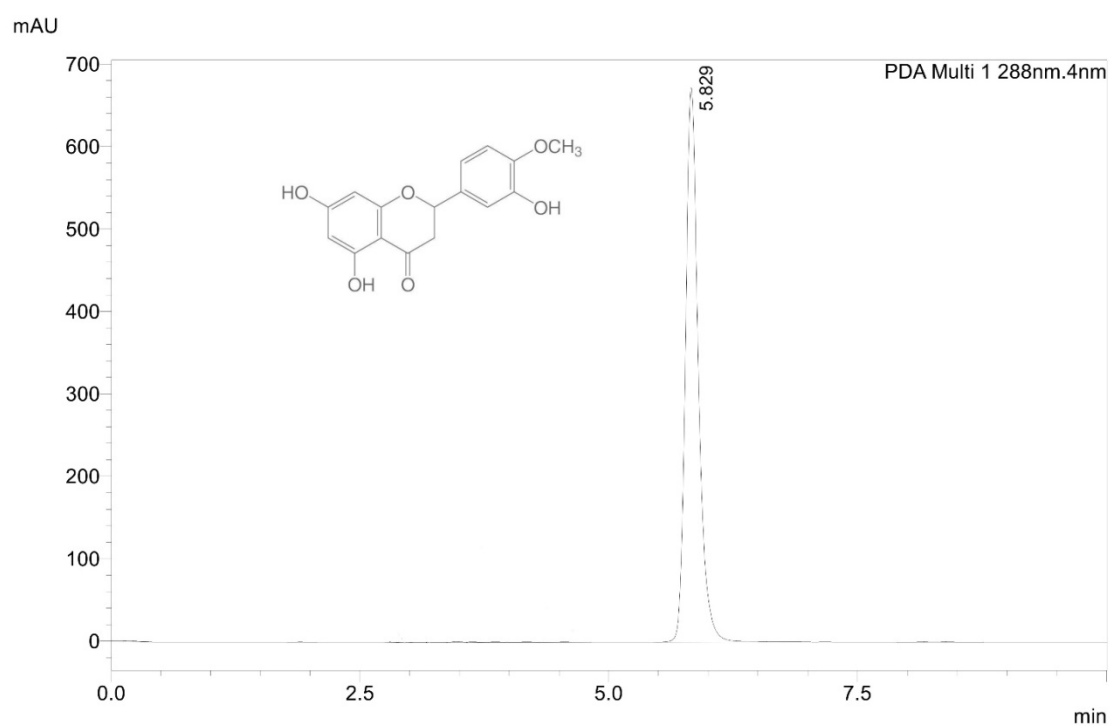

(b)

**Figure S1.** Chromatograms of Hed (a) and Het (b) for the developed method.

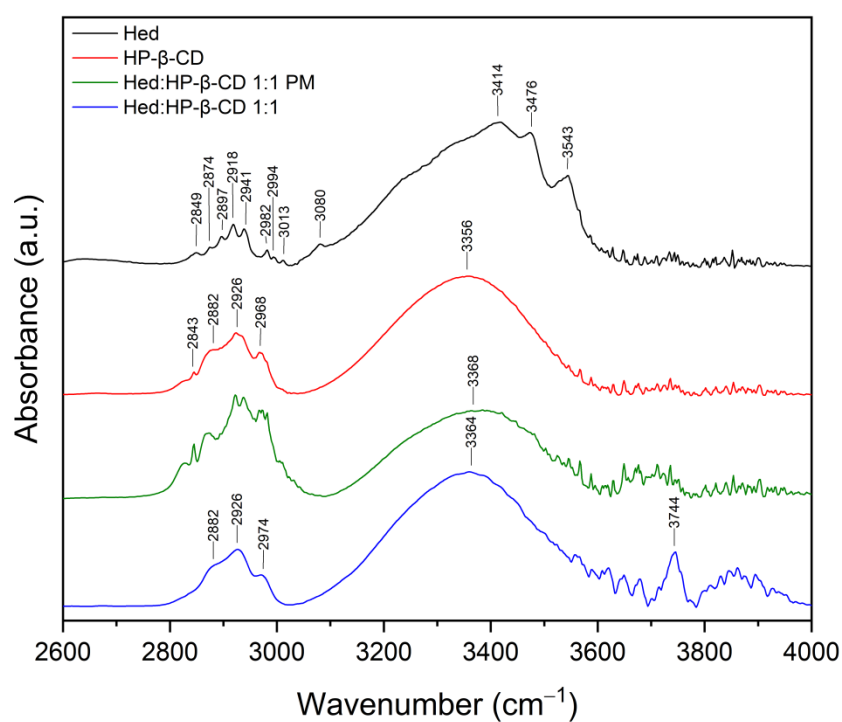

(a)

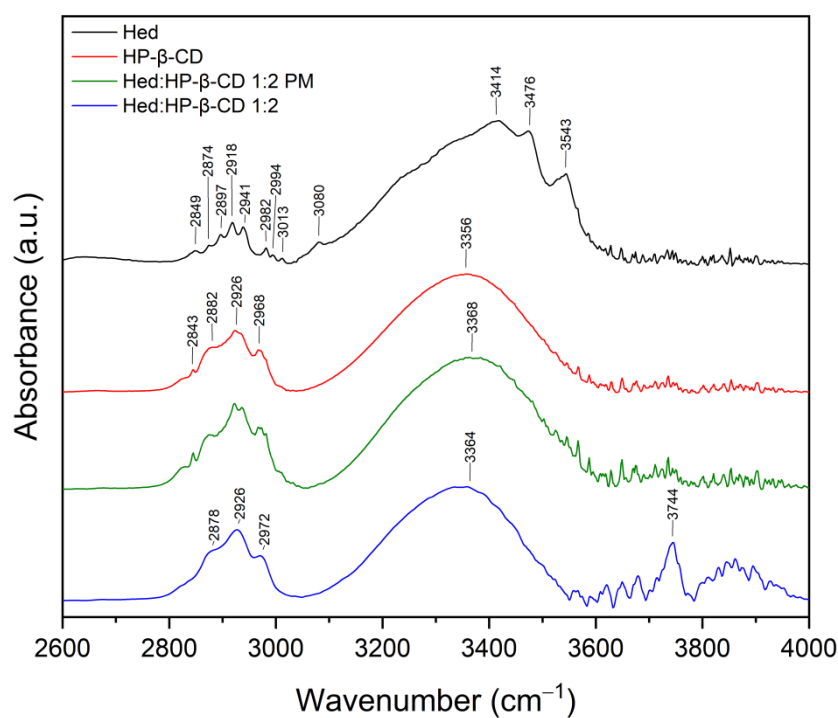

(b)

**Figure S2.** The results of FT-IR analysis of Hed (black), HP- $\beta$ -CD (red), Hed:HP- $\beta$ -CD 1:1 physical mixture (green), Hed:HP- $\beta$ -CD 1:1 physical mixture systems (blue) (a) and Hed (black), HP- $\beta$ -CD (red), Hed:HP- $\beta$ -CD 1:2 physical mixture (green), Hed:HP- $\beta$ -CD 1:2 physical mixture systems (blue) (b) range 2600–4000  $\text{cm}^{-1}$ .

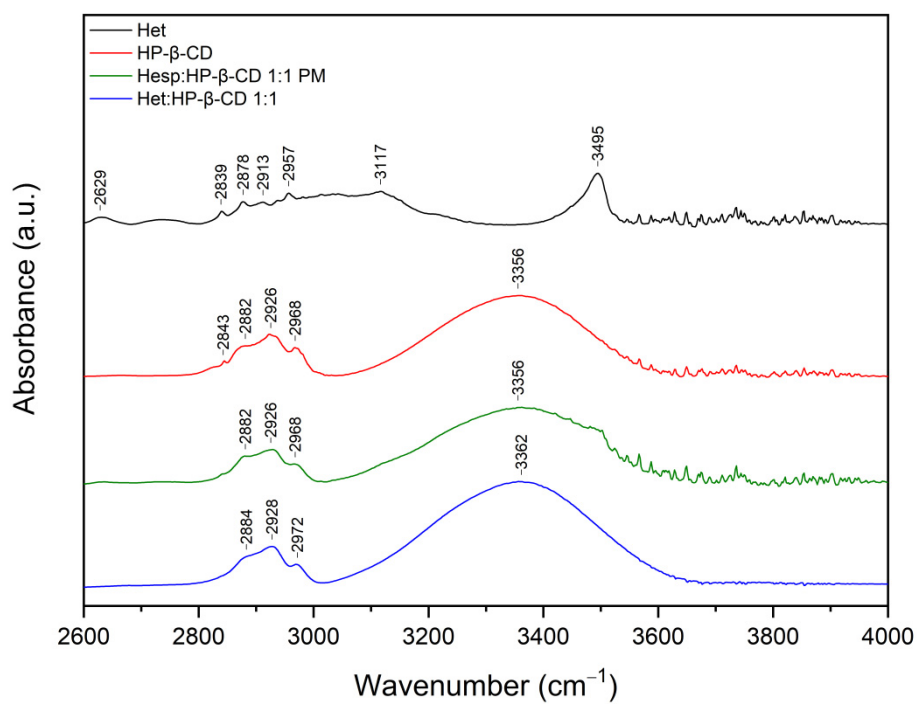

(a)

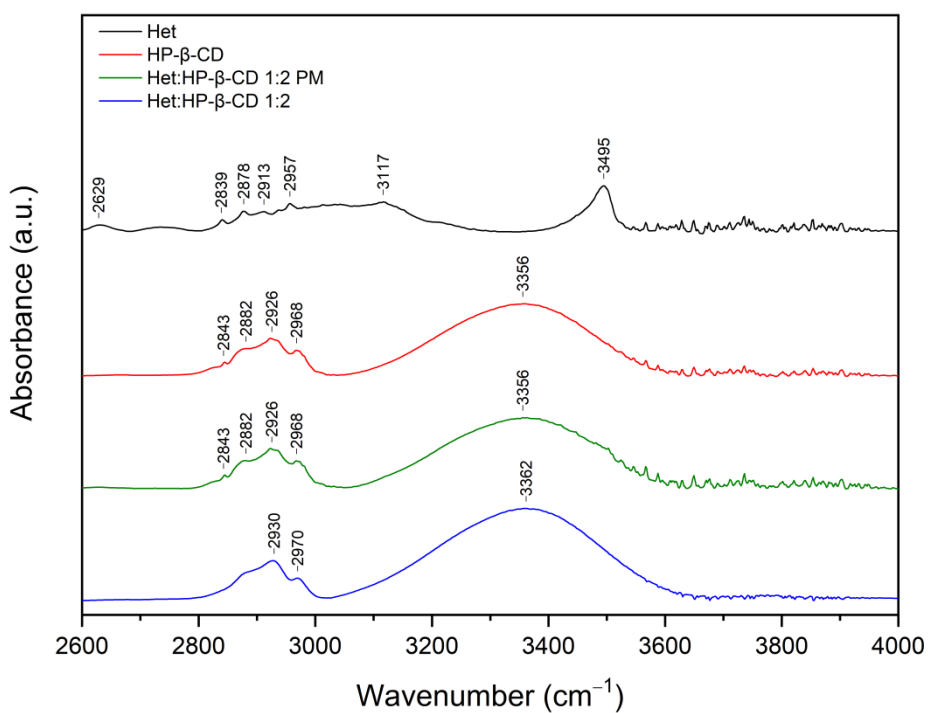

(b)

**Figure S3.** The results of FT-IR analysis of Het (black), HP- $\beta$ -CD (red), Het:HP- $\beta$ -CD 1:1 physical mixture (green), Het:HP- $\beta$ -CD 1:1 physical mixture systems (blue) (a) and Het (black), HP- $\beta$ -CD (red), Het:HP- $\beta$ -CD 1:2 physical mixture (green), Het:HP- $\beta$ -CD 1:2 physical mixture systems (blue) (b) range 2600–4000  $\text{cm}^{-1}$ .

**Table S1.** Selected experimental peaks (in  $\text{cm}^{-1}$ ) and band assignment of hesperidin, HP- $\beta$ -CD, Hed:HP- $\beta$ -CD 1:1 physical mixture, Hed:HP- $\beta$ -CD 1:1 system, Hed:HP- $\beta$ -CD 1:2 physical mixture, Hed:HP- $\beta$ -CD 1:2 system. Legend: def.-deformation, r-rocking, s-stretching, sc-scissoring, t-twisting, w-wagging

| Hed  | HP- $\beta$ -CD | Hed:HP- $\beta$ -CD<br>1:1 PM | Hed:HP- $\beta$ -CD<br>1:1 | Hed:HP- $\beta$ -CD<br>1:2 PM | Hed:HP- $\beta$ -CD<br>1:2 | Band assignment                                                                                                                                                                   |
|------|-----------------|-------------------------------|----------------------------|-------------------------------|----------------------------|-----------------------------------------------------------------------------------------------------------------------------------------------------------------------------------|
| 419  |                 | 419                           | 424                        | 419                           | 424                        | O-H w at rhamnose ring                                                                                                                                                            |
| 768  |                 | 766                           | -                          | 766                           | -                          | breathing B ring                                                                                                                                                                  |
| 816  |                 | 816                           | 806                        | 816                           | -                          | C-H w at A ring                                                                                                                                                                   |
|      | 847             | 849                           | 843                        | 847                           | 845                        | hydrogen bond formation between primary and secondary OH group [1] and the presence of glucopyranose units of 2-hydroxypropyl- $\beta$ -cyclodextrin in C1 chair conformation [2] |
| 849  |                 | 849                           | -                          | 847                           | -                          | C-H w at A and B rings                                                                                                                                                            |
| 910  |                 | -                             | -                          | -                             | -                          | C-O-C s in glucose ring + C-H r at $\text{CH}_2$ in rutinose                                                                                                                      |
|      | 947             | 947                           | 947                        | 947                           | 943                        | the presence of glucopyranose units of 2-hydroxypropyl- $\beta$ -cyclodextrin in C1 chair conformation [2]                                                                        |
|      | 1018            | 1015                          | 1016                       | 1016                          | 1013                       | *                                                                                                                                                                                 |
|      | 1034            | 1034                          | -                          | 1034                          | -                          | C-O s [3]                                                                                                                                                                         |
| 1034 |                 | 1034                          | -                          | 1034                          | -                          | C-C s in rutinose ring + C-C s between glucose and rhamnose rings                                                                                                                 |
| 1049 |                 | 1051                          | -                          | 1049                          | -                          | O-H r + C-O s at glucose ring                                                                                                                                                     |
| 1065 |                 | -                             | -                          | -                             | -                          | C-O s between glucose and rhamnose rings + C-C s in rutinose + O-H r in rutinose                                                                                                  |
|      | 1080            | -                             | 1078                       | 1080                          | 1078                       | *                                                                                                                                                                                 |
| 1094 |                 | 1092                          | -                          | -                             | -                          | C-H t in methyl group + C-O r and C-O s at rhamnose ring                                                                                                                          |
| 1130 |                 | 1126                          | -                          | 1128                          | -                          | O-H r and C-H w in methyl group at rhamnose ring                                                                                                                                  |
|      | 1150            | 1152                          | 1150                       | 1153                          | 1144                       | *                                                                                                                                                                                 |
| 1155 |                 | 1152                          | 1150                       | 1153                          | 1144                       | C-O s in rutinose + O-H r and C-H r in rutinose                                                                                                                                   |
| 1182 |                 | 1180                          | -                          | 1182                          | -                          | O-H r and C-H r at B ring + C-H r and C-H t at C ring                                                                                                                             |
| 1206 |                 | 1206                          | 1202                       | 1206                          | 1202                       | C-O asymmetric s in C-O-C between A ring and glucose ring + O-H r at glucose ring + C-H r in all molecule                                                                         |
| 1242 |                 | 1238                          | -                          | 1240                          | -                          | C-O-C asymmetric s in ring C + C-H r and O-H r at A ring                                                                                                                          |
| 1277 |                 | 1275                          | 1269                       | 1277                          | -                          | C-O-C s + O-H r at B ring + C-H r at C ring                                                                                                                                       |
| 1298 |                 | 1300                          | -                          | 1298                          | -                          | C-O s in C-O-C between A ring and glucose ring + O-H r at A ring + C-H r at C ring and glucose ring                                                                               |

\* in the range from 1000–1200  $\text{cm}^{-1}$  with maxima at 1018, 1080 and 1150  $\text{cm}^{-1}$  is defined as coupled vibration of C-O, C-O-C, C-C-O and C-C-C asymmetric valence vibrations [2];

**Table S1. continued** Selected experimental peaks (in cm<sup>-1</sup>) and band assignment of hesperidin, HP-β-CD, Hed:HP-β-CD 1:1 physical mixture, Hed:HP-β-CD 1:1 system, Hed:HP-β-CD 1:2 physical mixture, Hed:HP-β-CD 1:2 system. Legend: def.-deformation, r-rocking, s-stretching, sc-scissoring, t-twisting, w-wagging

| Hed  | HP-β-CD | Hed:HP-β-CD 1:1 PM | Hed:HP-β-CD 1:1 | Hed:HP-β-CD 1:2 PM | Hed:HP-β-CD 1:2 | Band assignment                                        |
|------|---------|--------------------|-----------------|--------------------|-----------------|--------------------------------------------------------|
|      | 1335    | -                  | 1335            | 1335               | 1335            | C-H vibration [1]                                      |
| 1341 |         | 1339               | -               | 1339               | -               | C-C-C s in A ring + C-H r in all molecule              |
| 1356 |         | -                  | -               | -                  | -               | C-H w at C ring + C-H r in all molecule                |
|      | 1368    | 1362               | 1368            | 1364               | 1366            | C-H vibration [1]                                      |
| 1441 |         | -                  | -               | -                  | -               | C-H w in methoxy group at B ring                       |
|      | 1458    | 1456               | 1450            | 1458               | 1454            | asymmetric C-H deformation vibrations in the plane [2] |
| 1506 |         | 1508               | 1514            | 1508               | -               | C-H sc in methyl group at B ring                       |
| 1518 |         | 1518               | 1514            | 1518               | 1512            | C-C-C s in A ring + O-H r at A ring + C-H r at C ring  |
| 1605 |         | 1605               | -               | 1605               | -               | O-H r at ring A + C=C s in ring A + C=O s at ring C    |
| 1645 |         | 1647               | 1639            | 1647               | 1639            | O-H r at A ring + C=C s in A ring + C=O s at C ring    |
| -    | -       | -                  | 1742            | -                  | 1742            | new unidentified band                                  |
|      | 2843    | 2845               | -               | 2845               | -               | vibration of the -CH and -CH <sub>2</sub> - groups [4] |
| 2849 |         | 2845               | -               | 2845               | -               |                                                        |
| 2874 |         | 2870               | -               | 2875               | -               | C-H s in glucose ring                                  |
|      | 2882    | 2870               | 2882            | 2875               | 2878            | vibration of the -CH and -CH <sub>2</sub> - groups [4] |
| 2897 |         | -                  | -               | -                  | -               | C-H at rhamnose ring                                   |
| 2918 |         | 2922               | -               | 2923               | -               | C-H s in methoxy group at B ring                       |
|      | 2926    | -                  | 2926            | -                  | 2926            | C-H stretching of sp <sup>3</sup> carbons [5]          |
| 2941 |         | 2937               | -               | 2937               | -               | C-H s at rhamnose ring                                 |
|      | 2968    | 2968               | 2974            | 2968               | 2972            | CH <sub>3</sub> and CH vibrations [3]                  |
| 2982 |         | 2980               | -               | -                  | -               | C-H s at rhamnose ring                                 |
| 2994 |         | -                  | -               | -                  | -               | C-H s in methoxy group at B ring                       |
| 3013 |         | 3007               | -               | 3009               | -               | C-H s in methyl group at rhamnose ring                 |
| 3080 |         | -                  | -               | -                  | -               | C-H s in methoxy group at B ring                       |
|      | 3356    | 3368               | 3364            | 3368               | 3364            | O-H s [6]                                              |
| 3414 |         | 3368               | 3364            | 3368               | 3364            | O-H s at A ring                                        |
| 3476 |         | -                  | -               | -                  | -               | O-H s at rhamnose ring                                 |
| 3543 |         | -                  | -               | -                  | -               | O-H s at rhamnose ring                                 |
| -    | -       | -                  | 3744            | -                  | 3744            | new unidentified band                                  |

**Table S2.** Selected experimental peaks (in  $\text{cm}^{-1}$ ) and band assignment of hesperetin, HP- $\beta$ -CD, Het:HP- $\beta$ -CD 1:1 physical mixture, Het:HP- $\beta$ -CD 1:1 system, Het:HP- $\beta$ -CD 1:2 physical mixture, Het:HP- $\beta$ -CD 1:2 system. Legend: def.-deformation, r-rocking, s-stretching, sc-scissoring, t-twisting, w-wagging

| Het  | HP- $\beta$ -CD | Het:HP- $\beta$ -CD<br>1:1 PM | Het:HP- $\beta$ -CD<br>1:1 | Het:HP- $\beta$ -CD<br>1:2 PM | Het:HP- $\beta$ -CD<br>1:2 | Band assignment                                                                                                                                            |
|------|-----------------|-------------------------------|----------------------------|-------------------------------|----------------------------|------------------------------------------------------------------------------------------------------------------------------------------------------------|
| 650  |                 | 650                           | -                          | 650                           | -                          | def. all molecule                                                                                                                                          |
| 739  |                 | 739                           | -                          | -                             | -                          | C-H w at A ring                                                                                                                                            |
| 812  |                 | 814                           | -                          | 814                           | -                          | C-H w at A and B ring                                                                                                                                      |
|      | 847             | 847                           | 851                        | 854                           | 851                        | hydrogen bond formation between primary and secondary OH group [1] and the presence of glucopyranose units of HP- $\beta$ -CD in C1 chair conformation [2] |
| 878  |                 | 878                           | -                          | -                             | -                          | C-H w at B ring                                                                                                                                            |
| 957  |                 | 951                           | -                          | -                             | -                          | breathing A ring + def. C ring + C-C-C s in B ring + C-H r at B ring                                                                                       |
|      | 947             | 951                           | 947                        | 949                           | 947                        | the presence of glucopyranose units of 2-hydroxypropyl- $\beta$ -cyclodextrin in C1 chair conformation [2]                                                 |
|      | 1018            | 1024                          | 1016                       | 1024                          | 1016                       | *                                                                                                                                                          |
| 1024 |                 | 1024                          | -                          | -                             | -                          | def. B ring + -O-C- s in methoxy group at B ring + C-C-C s in A ring                                                                                       |
|      | 1034            | -                             | -                          | 1034                          | -                          | C-O s [3]                                                                                                                                                  |
| 1063 |                 | 1061                          | -                          | -                             | -                          | C-C s in C ring                                                                                                                                            |
|      | 1080            | 1082                          | 1080                       | 1080                          | 1080                       | *                                                                                                                                                          |
| 1092 |                 | -                             | -                          | -                             | -                          | C-O-C asymmetric s in C ring + C-C-C r in A ring + -O-H r at A ring                                                                                        |
| 1124 |                 | 1126                          | 1126                       | 1124                          | -                          | C-C-C sc in B ring + C-H sc and O-H r at B ring                                                                                                            |
|      | 1150            | 1153                          | 1152                       | 1153                          | 1153                       | *                                                                                                                                                          |
| 1169 |                 | -                             | -                          | -                             | -                          | breathing B ring + C-H w and C-H t in methylene group at C ring + -O-H r at A ring                                                                         |
| 1202 |                 | 1204                          | 1202                       | 1204                          | -                          | -O-H r at A and B ring + C-H r at B ring + C-H w at C ring                                                                                                 |
| 1240 |                 | 1240                          | -                          | 1240                          | -                          | C-H w at ring C + C-H r and -O-H r at A and B ring                                                                                                         |
| 1261 |                 | 1261                          | -                          | 1261                          | -                          | C-H w at C ring + breathing A ring + C-H r and -O-H sc at A ring                                                                                           |
| 1281 |                 | 1283                          | -                          | 1282                          | 1277                       | C-H w at C ring + C-H r + -O-H sc + -C-O s at B ring                                                                                                       |
| 1304 |                 | 1304                          | -                          | 1306                          | -                          | C-H w + C-H w in methylene group at C ring + -O-H sc at B ring                                                                                             |
|      | 1335            | 1339                          | 1333                       | 1339                          | 1337                       | C-H vibration [1]                                                                                                                                          |

\* in the range from 1000–1200  $\text{cm}^{-1}$  with maxima at 1018, 1080 and 1150  $\text{cm}^{-1}$  is defined as coupled vibration of C-O, C-O-C, C-C-O and C-C-C asymmetric valence vibrations [2];

**Table S2. continued** Selected experimental peaks (in cm<sup>-1</sup>) and band assignment of hesperetin, HP-β-CD, Het:HP-β-CD 1:1 physical mixture, Het:HP-β-CD 1:1 system, Het:HP-β-CD 1:2 physical mixture, Het:HP-β-CD 1:2 system. Legend: def.-deformation, r-rocking, s-stretching, sc-scissoring, t-twisting, w-wagging

| Het  | HP-β-CD | Het:HP-β-CD<br>1:1 PM | Het:HP-β-CD<br>1:1 | Het:HP-β-CD<br>1:2 PM | Het:HP-β-CD<br>1:2 | Band assignment                                                                                        |
|------|---------|-----------------------|--------------------|-----------------------|--------------------|--------------------------------------------------------------------------------------------------------|
| 1337 |         | 1339                  | 1333               | 1339                  | 1337               | breathing B ring + C–C–C s in A ring + C–H r in all molecule                                           |
| 1360 |         | 1362                  | 1369               | 1362                  | 1369               | C–H r + C–H w in methylene group at C ring + C–C–C s in B ring + –O–H sc at B ring                     |
|      | 1368    | 1362                  | 1369               | 1362                  | 1369               | C–H vibration [1]                                                                                      |
| 1400 |         | 1400                  | -                  | 1400                  | -                  | breathing B ring + C–C–C asymmetric s in A ring + C–H w at C ring + C–H w in methylene group at C ring |
| 1441 |         | 1441                  | -                  | 1441                  | -                  | C–C–C s in B ring + C–H r + C–O–H sc + C–H w in methyl group and C–H r at B ring                       |
|      | 1458    | 1458                  | 1454               | 1456                  | 1460               | asymmetric C–H deformation vibrations in the plane [2]                                                 |
| 1474 |         | 1474                  | -                  | 1474                  | -                  | C–O–H sc + C–H r at A ring + C–C s in A ring + C–H r at C ring                                         |
| 1503 |         | 1508                  | 1516               | 1508                  | -                  | C–C–C s in B ring + C–O–H sc, C–H w in methyl group and C–H r at B ring                                |
| 1576 |         | 1580                  | 1580               | 1576                  | -                  | C–C–C sc in A ring + C–O–H sc at A ring                                                                |
| 1634 |         | 1636                  | 1639               | 1636                  | 1639               | C=O s at C ring + C–C–C asymmetric s in A ring                                                         |
|      | 2843    | -                     | -                  | 2843                  | -                  | vibration of the –CH and –CH <sub>2</sub> – groups [4]                                                 |
| 2839 |         | 2843                  | -                  | -                     | -                  | C–H symmetric s in methoxy group at B ring                                                             |
| 2878 |         | -                     | -                  | -                     | -                  | C–H symmetric s in methylene group at C ring                                                           |
|      | 2882    | 2882                  | 2884               | 2882                  | 2882               | vibration of the –CH and –CH <sub>2</sub> – groups [4]                                                 |
| 2913 |         | -                     | -                  | -                     | -                  | C–H s in methoxy group at B ring                                                                       |
|      | 2926    | 2926                  | 2928               | 2926                  | 2930               | C–H s of sp <sup>3</sup> carbons [5]                                                                   |
| 2957 |         | -                     | -                  | -                     | -                  | C–H s at B ring                                                                                        |
|      | 2968    | 2968                  | 2972               | 2968                  | 2970               | CH <sub>3</sub> and CH vibrations [3]                                                                  |
|      | 3356    | 3356                  | 3362               | 3356                  | 3362               | O–H s [6]                                                                                              |
| 3495 |         | -                     | -                  | -                     | -                  | O–H s at A and B ring                                                                                  |



Table S3. Powder diffraction data

| Hed     |            |                | Het     |            |                |
|---------|------------|----------------|---------|------------|----------------|
| Angle   | d Value    | Rel. Intensity | Angle   | d Value    | Rel. Intensity |
| 7,070°  | 12,49385 Å | 4,2%           | 7,246°  | 12,19070 Å | 38,0%          |
| 7,722°  | 11,43898 Å | 4,1%           | 10,781° | 8,19974 Å  | 4,5%           |
| 8,506°  | 10,38649 Å | 13,1%          | 13,027° | 6,79066 Å  | 5,1%           |
| 11,356° | 7,78588 Å  | 5,6%           | 14,067° | 6,29087 Å  | 19,5%          |
| 12,160° | 7,27247 Å  | 44,1%          | 14,525° | 6,09324 Å  | 87,5%          |
| 13,227° | 6,68821 Å  | 6,3%           | 15,492° | 5,71523 Å  | 12,3%          |
| 13,654° | 6,47987 Å  | 21,3%          | 15,997° | 5,53577 Å  | 2,3%           |
| 15,554° | 5,69249 Å  | 93,2%          | 16,936° | 5,23087 Å  | 100,0%         |
| 16,233° | 5,45576 Å  | 38,1%          | 17,658° | 5,01864 Å  | 39,2%          |
| 17,115° | 5,17661 Å  | 4,2%           | 18,828° | 4,70934 Å  | 0,9%           |
| 18,276° | 4,85030 Å  | 11,3%          | 20,046° | 4,42598 Å  | 5,6%           |
| 18,522° | 4,78638 Å  | 21,4%          | 20,912° | 4,24459 Å  | 25,5%          |
| 19,588° | 4,52844 Å  | 100,0%         | 21,801° | 4,07348 Å  | 6,0%           |
| 20,737° | 4,27993 Å  | 17,6%          | 22,600° | 3,93125 Å  | 18,4%          |
| 21,255° | 4,17679 Å  | 45,7%          | 22,998° | 3,86400 Å  | 24,0%          |
| 22,411° | 3,96382 Å  | 56,9%          | 23,496° | 3,78327 Å  | 34,0%          |
| 23,252° | 3,82236 Å  | 5,1%           | 24,871° | 3,57708 Å  | 14,5%          |
| 23,781° | 3,73851 Å  | 20,0%          | 25,434° | 3,49925 Å  | 14,2%          |
| 24,797° | 3,58756 Å  | 42,3%          | 26,234° | 3,39435 Å  | 59,4%          |
| 25,644° | 3,47105 Å  | 6,7%           | 27,475° | 3,24370 Å  | 7,2%           |
| 26,099° | 3,41153 Å  | 12,3%          | 28,419° | 3,13808 Å  | 5,9%           |
| 26,620° | 3,34592 Å  | 12,6%          | 29,464° | 3,02914 Å  | 49,6%          |
| 27,698° | 3,21812 Å  | 12,3%          | 31,031° | 2,87963 Å  | 3,6%           |
| 28,716° | 3,10625 Å  | 11,9%          | 31,467° | 2,84069 Å  | 1,4%           |
| 29,773° | 2,99836 Å  | 3,5%           | 31,920° | 2,80141 Å  | 1,5%           |
| 30,443° | 2,93388 Å  | 4,3%           | 32,719° | 2,73481 Å  | 4,9%           |
| 31,214° | 2,86320 Å  | 3,9%           | 33,197° | 2,69654 Å  | 1,0%           |
| 32,034° | 2,79171 Å  | 10,8%          | 34,121° | 2,62562 Å  | 2,8%           |
| 32,924° | 2,71825 Å  | 5,6%           | 35,576° | 2,52146 Å  | 6,0%           |
| 34,845° | 2,57267 Å  | 3,1%           | 36,183° | 2,48057 Å  | 2,5%           |
| 36,220° | 2,47807 Å  | 6,3%           | 36,986° | 2,42850 Å  | 2,1%           |
| 37,087° | 2,42212 Å  | 12,3%          | 37,420° | 2,40134 Å  | 1,8%           |

**Table S3. continued** Powder diffraction data

| Hed     |           |                | Het     |           |                |
|---------|-----------|----------------|---------|-----------|----------------|
| Angle   | d Value   | Rel. Intensity | Angle   | d Value   | Rel. Intensity |
| 38,184° | 2,35506 Å | 2,0%           | 38,148° | 2,35718 Å | 3,2%           |
| 39,671° | 2,27011 Å | 3,3%           | 38,630° | 2,32890 Å | 1,3%           |
| 40,295° | 2,23641 Å | 2,3%           | 39,865° | 2,25954 Å | 5,0%           |
| 40,697° | 2,21521 Å | 3,3%           | 41,463° | 2,17606 Å | 1,3%           |
| 41,614° | 2,16851 Å | 2,4%           | 42,658° | 2,11780 Å | 2,2%           |
| 42,658° | 2,11780 Å | 1,3%           | 43,780° | 2,06613 Å | 0,8%           |
| 44,137° | 2,05022 Å | 4,1%           | 44,726° | 2,02459 Å | 8,5%           |

**Table S4.** Validation parameters of HPLC-DAD methods for concentration determination of Hed and Het

| Hed                                    |                                                      |
|----------------------------------------|------------------------------------------------------|
| Parameter                              | Hed dissolved in 50% DMSO;<br>Injection volume 10 µl |
| Linearity range (mg·mL <sup>-1</sup> ) | 0.005 – 1.0                                          |
| Correlation coefficient (r)            | 0.9991                                               |
| a ± S <sub>a</sub>                     | 20576576 ± 455212                                    |
| b ± S <sub>b</sub>                     | insignificant (α=0.05)                               |
| LOD (mg·mL <sup>-1</sup> )             | 0.0379                                               |
| LOQ (mg·mL <sup>-1</sup> )             | 0.1147                                               |
| Retention Time                         | 4.17                                                 |
| Het                                    |                                                      |
| Parameter                              | Het dissolved in 50% DMSO;<br>Injection volume 10 µl |
| Linearity range (mg·mL <sup>-1</sup> ) | 0.005 – 1.0                                          |
| Correlation coefficient (r)            | 0.9986                                               |
| a ± S <sub>a</sub>                     | 37898529 ± 1041449                                   |
| b ± S <sub>b</sub>                     | insignificant (α=0.05)                               |
| LOD (mg·mL <sup>-1</sup> )             | 0.0459                                               |
| LOQ (mg·mL <sup>-1</sup> )             | 0.1391                                               |
| Retention Time (min)                   | 5.83                                                 |

**Table S5.** The results of fitting factors *f1*, *f2* analysis

| Compared systems |                    | <i>f1</i> | <i>f2</i> |
|------------------|--------------------|-----------|-----------|
| Hed              | Hed:HP-β-CD 1:1    | 1404      | 15        |
| Hed              | Hed:HP-β-CD 1:2    | 2211      | 5         |
| Hed              | Hed:HP-β-CD 1:1 PM | 130       | 67        |
| Hed              | Hed:HP-β-CD 1:2 PM | 207       | 56        |
| Het              | Het:HP-β-CD 1:1    | 621       | 11        |
| Het              | Het:HP-β-CD 1:2    | 787       | 6         |
| Het              | Het:HP-β-CD 1:1 PM | 128       | 44        |
| Het              | Het:HP-β-CD 1:2 PM | 199       | 34        |
